# Supplementary material
Source: publisher site journal article supplement (https://www.dovepress.com/article/301552)
Supplement: Supplementary file 1 [file get_supplementary_file.php]

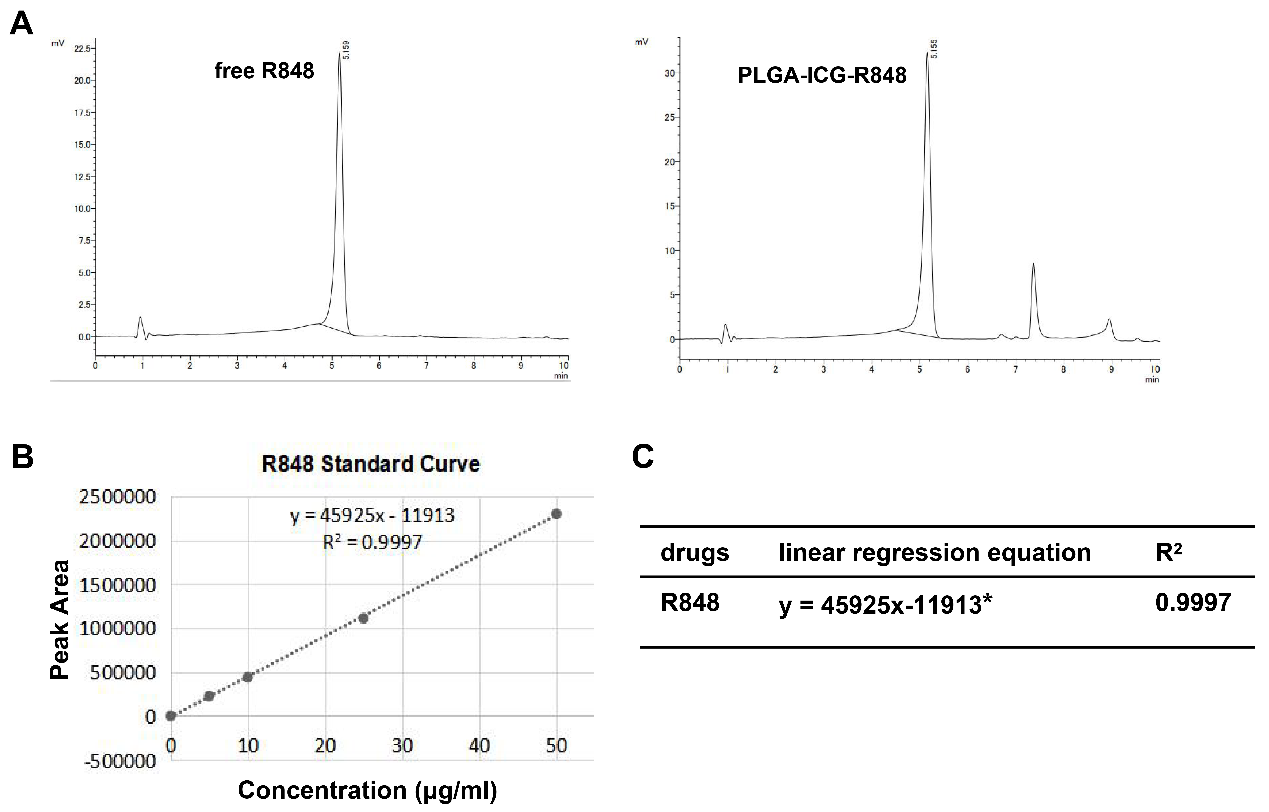


**Supplementary Figure 1 The standard curve and correlation equation of R848 determined by HPLC.**

(**A**) HPLC chromatogram of free R848 and PLGA-ICG-R848. (**B**) The standard curve of R848 determined by HPLC. (**C**) The linear regression equation of R848 standard curve was calculated as y = 45925x-11913 (R2 = 0.9997). *y: Peak area; x: Concentration (µg/ml). The correlation coefficient is higher than 0.999, showing a good linearity.
